# Supplementary material for: Straightforward neuron micropatterning and neuronal network construction on cell-repellent polydimethylsiloxane using microfluidics-guided functionalized Pluronic modification
Source: Royal Society of Chemistry journal article supplement (doi:10.1039/d0an02139c), 2020-12-10
Supplement: d0an02139c1.pdf [file d0an02139c1.pdf]

Electronic Supplementary Information (ESI) for Analyst

*This journal is © The Royal Society of Chemistry 2020*

## Electronic Supplementary Information

Straightforward neuron micropatterning and neuronal network construction on cell-repellent polydimethylsiloxane using microfluidics-guided functionalized Pluronic modification

Wenming Liu,<sup>\*ab</sup> Wenzhu Fu,<sup>a</sup> Meilin Sun,<sup>a</sup> Kai Han,<sup>a</sup> Rui Hu,<sup>a</sup> Dan Liu<sup>a</sup> and Jinyi Wang<sup>\*b</sup>

*<sup>a</sup>Departments of Biomedical Engineering and Pathology, School of Basic Medical Science, Central South University, Changsha, Hunan 410013, China. E-mail: liuwenming0229@csu.edu.cn*

*<sup>b</sup>Department of Chemistry, College of Chemistry and Pharmacy, Northwest A&F University, Yangling, Shaanxi 712100, China. E-mail: jywang@nwsuaf.edu.cn*

**Abstract.** This supplementary information provides all the additional information as mentioned in the text.

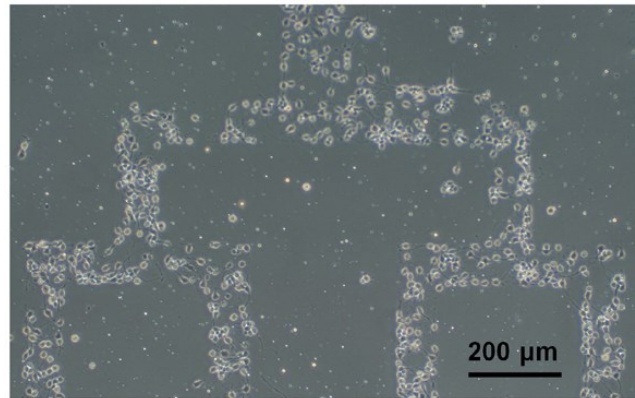

**Fig. S1** Neuronal cell distribution after 1 d in culture on the modified PDMS substrate by F127-PDL using microfluidics.

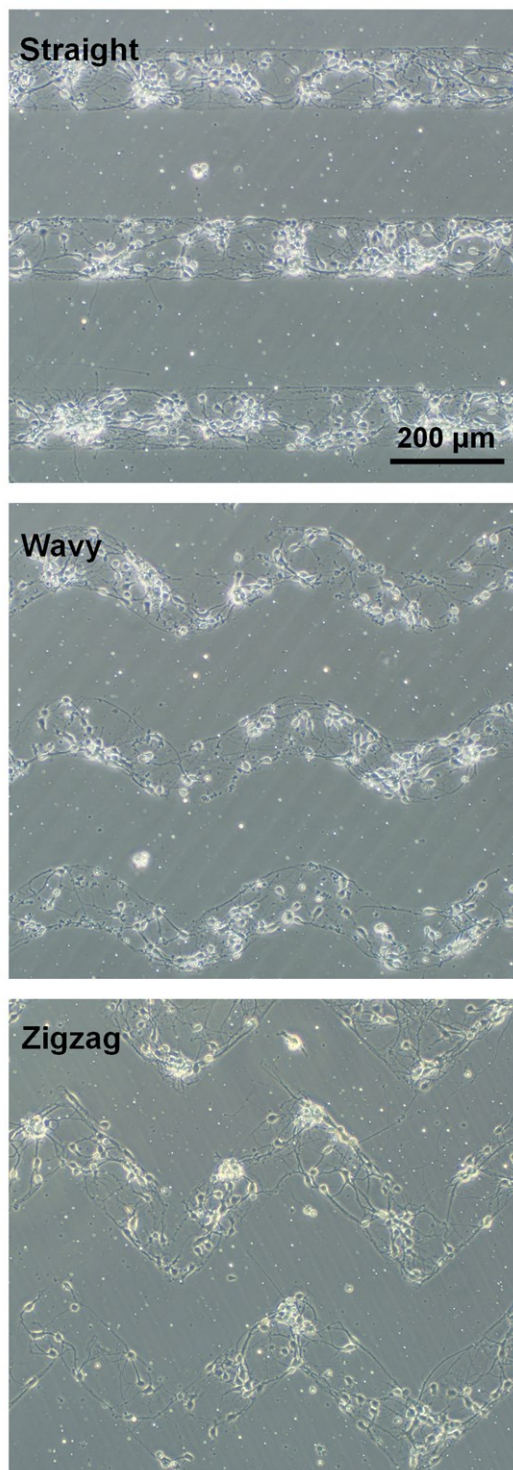

**Fig. S2** Optical images of 5 d neuronal cultures on the modified PDMS surface by microfluidic F127-PDL deposition with respective straight (top), wavy (middle), and zigzag (bottom) stripe geometry.

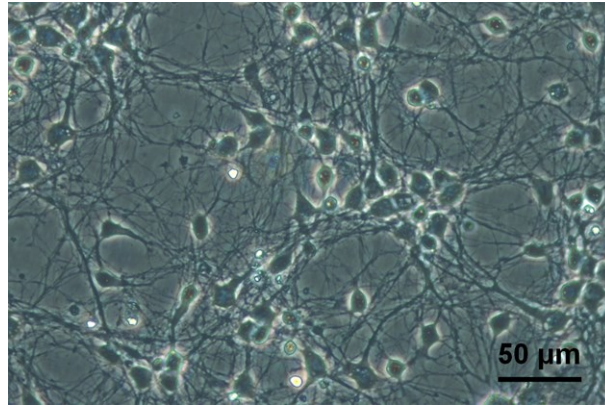

**Fig. S3** Optical image of 5 d standard neuronal cultures on the PDL-modified PS surface.

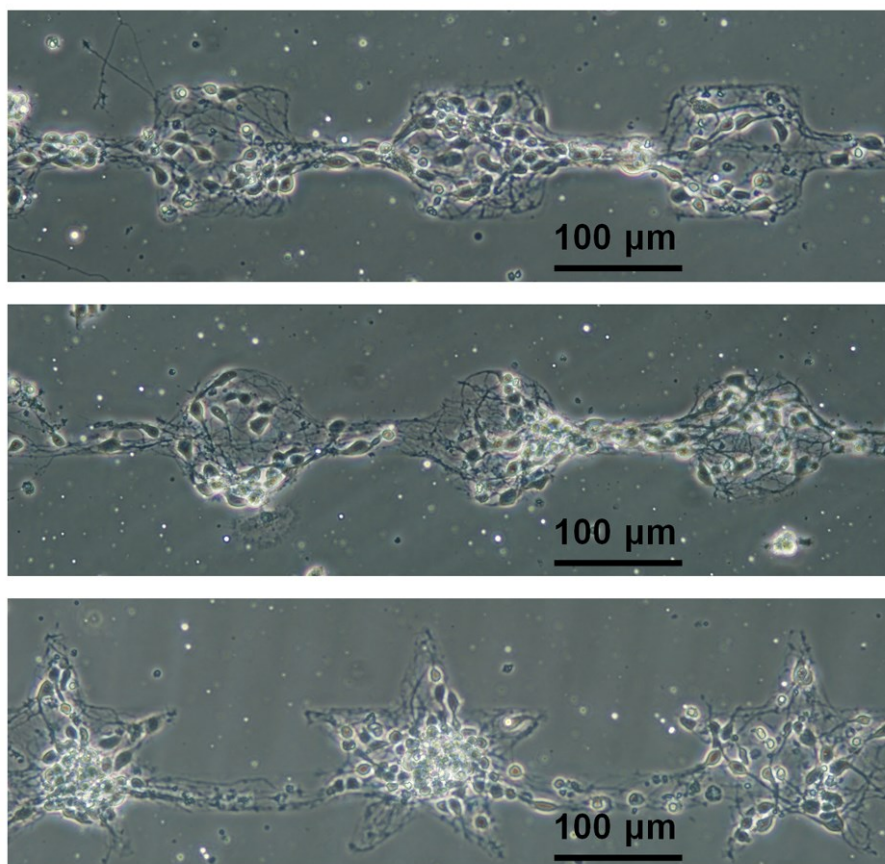

**Fig. S4** Optical images of 5 d neuronal cultures on the modified PDMS surface by microfluidic F127-PDL deposition with respective square (top), circular (middle), and pentagonal (bottom) geometry.

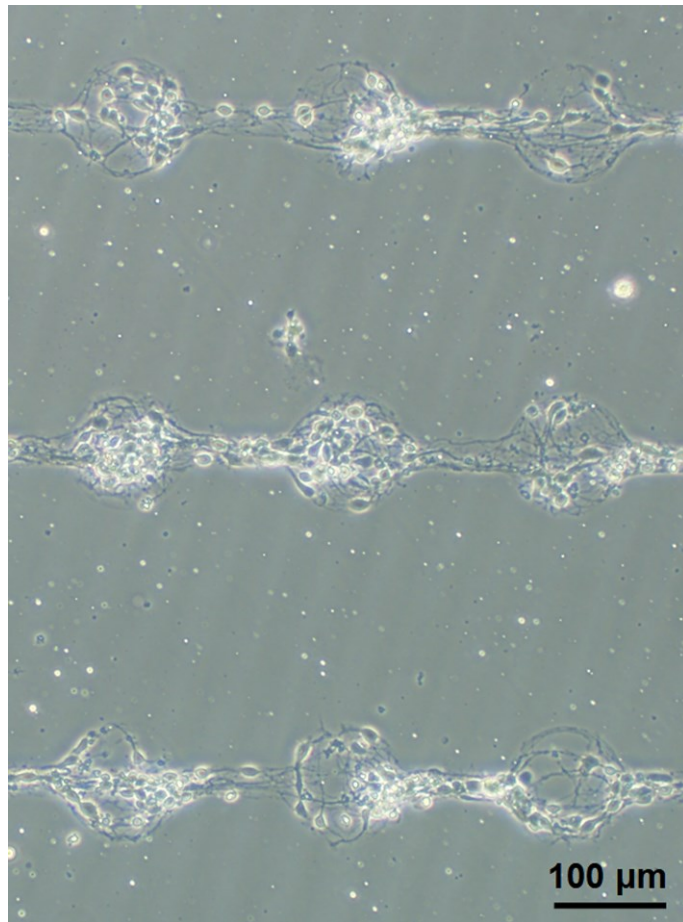

**Fig. S5** Optical images of 5 d neuronal cultures on the modified PDMS surface by microfluidic F127-PDL deposition with circular geometry.

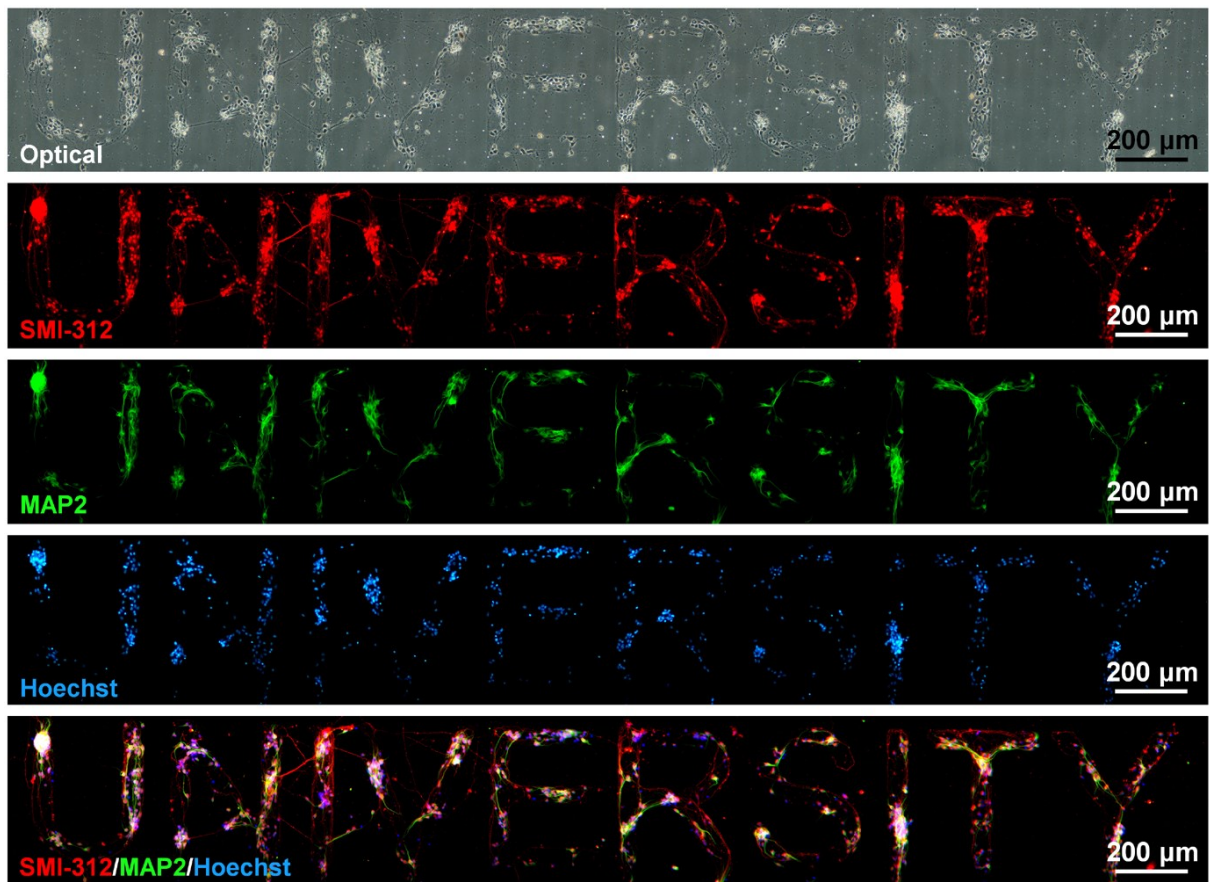

**Fig. S6** Optical and fluorescent images of 5 d neuronal cultures on the modified PDMS surface by microfluidic F127-PDL deposition with a word (university)-like geometry. Immunocytochemical staining was performed for neuronal visualization (axon: SMI-312; somatodendrite: MAP2; nucleus: Hoechst 33258).

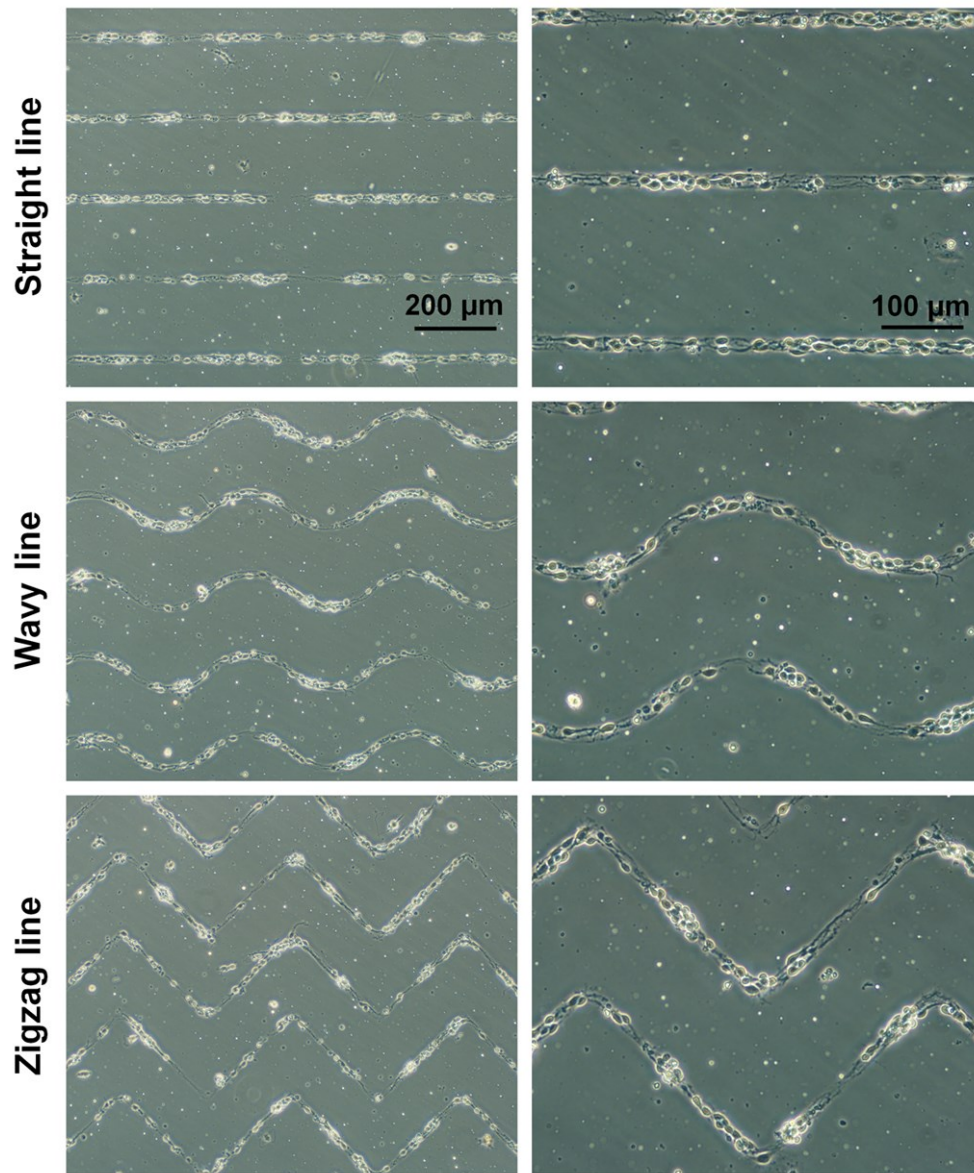

**Fig. S7** Optical images of 5 d neuronal cultures on the modified PDMS surface by microfluidic F127-PDL deposition with respective straight (top), wavy (middle), and zigzag (bottom) line geometry.



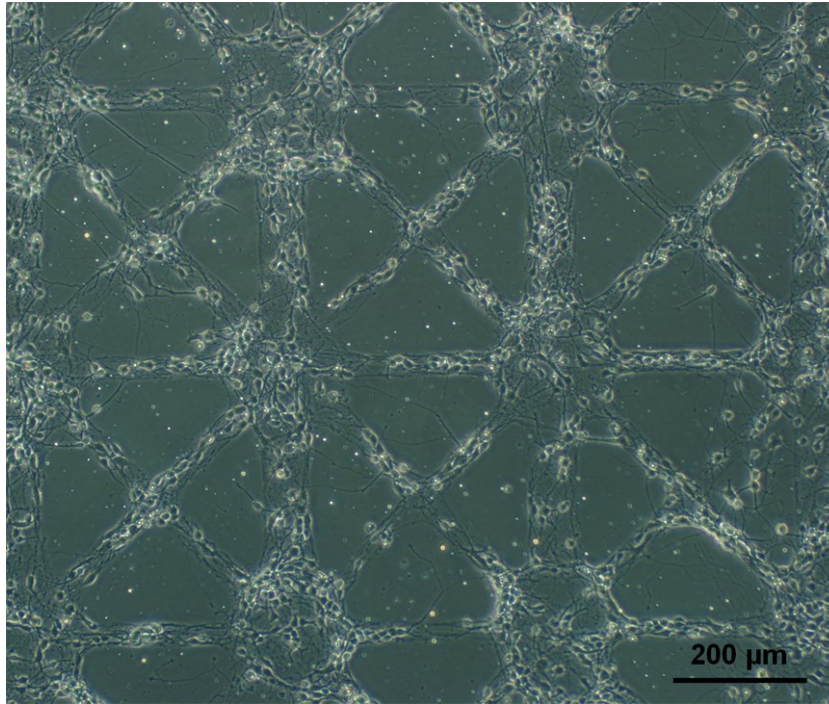

**Fig. S8** Optical image of neuronal network after 7 d in culture on the modified PDMS surface by microfluidic F127-PDL deposition with interconnected spot array shape.
